# Supplementary material for: Anti-Proliferative Effects of an Extra-Virgin Olive Oil Extract Enriched in Ligstroside Aglycone and Oleocanthal on Human Liver Cancer Cell Lines
Source: MDPI journal article supplement (doi:10.3390/cancers11111640), 2019-10-24
Supplement: s1 [file s1]

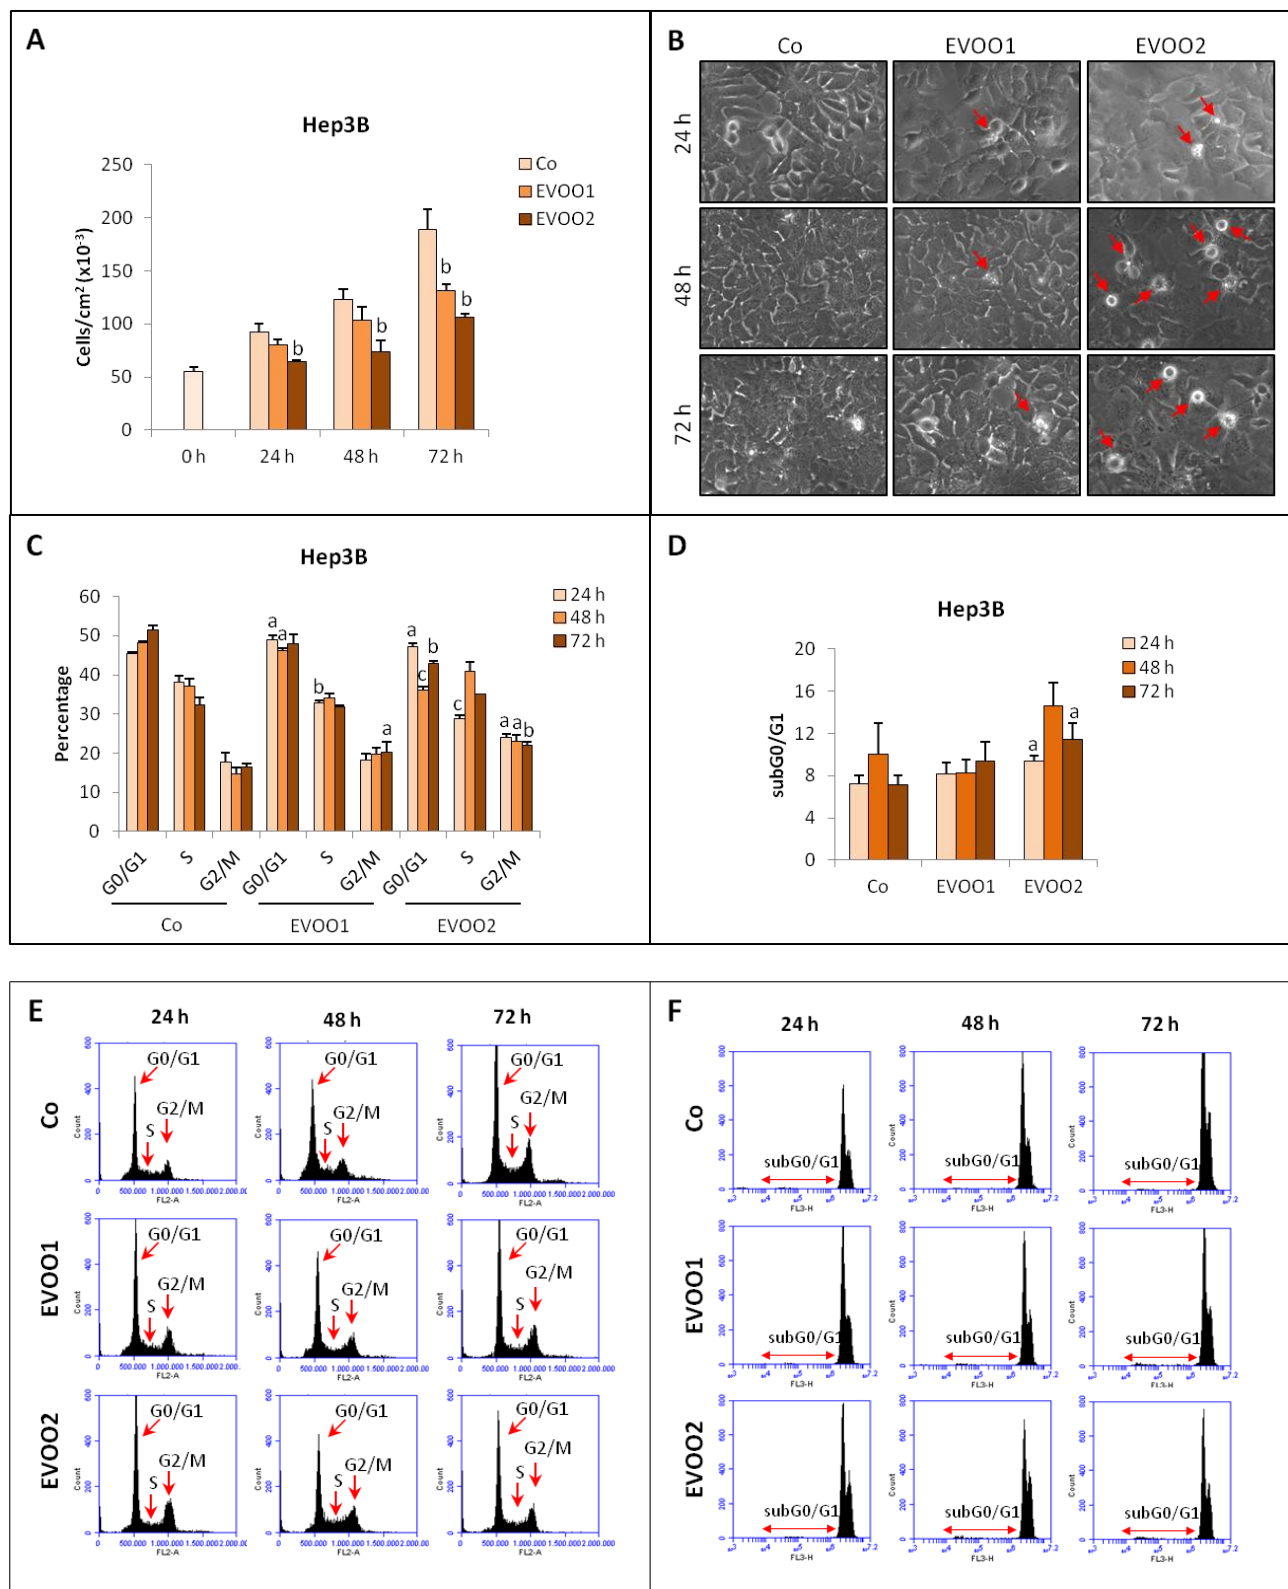

**Figure S1:** (A) Growth curve, (B) morphological analysis, (C) cell cycle distribution, (D) percentage of cells in sub G0/G1, (E, F) cytograms of cell cycle and subG0/G1 of Hep3B cell line incubated for 24-72 h with two doses of EVOO. The results are representative of three experiments. Data are presented as mean  $\pm$  SD. (a  $p < 0.05$ , b  $p < 0.01$ , c  $p < 0.001$  vs Co).
