# Supplementary material for: Anti-Proliferative Effects of an Extra-Virgin Olive Oil Extract Enriched in Ligstroside Aglycone and Oleocanthal on Human Liver Cancer Cell Lines
Source: MDPI journal article supplement (doi:10.3390/cancers11111640), 2019-10-24
Supplement: s1 [file s1]

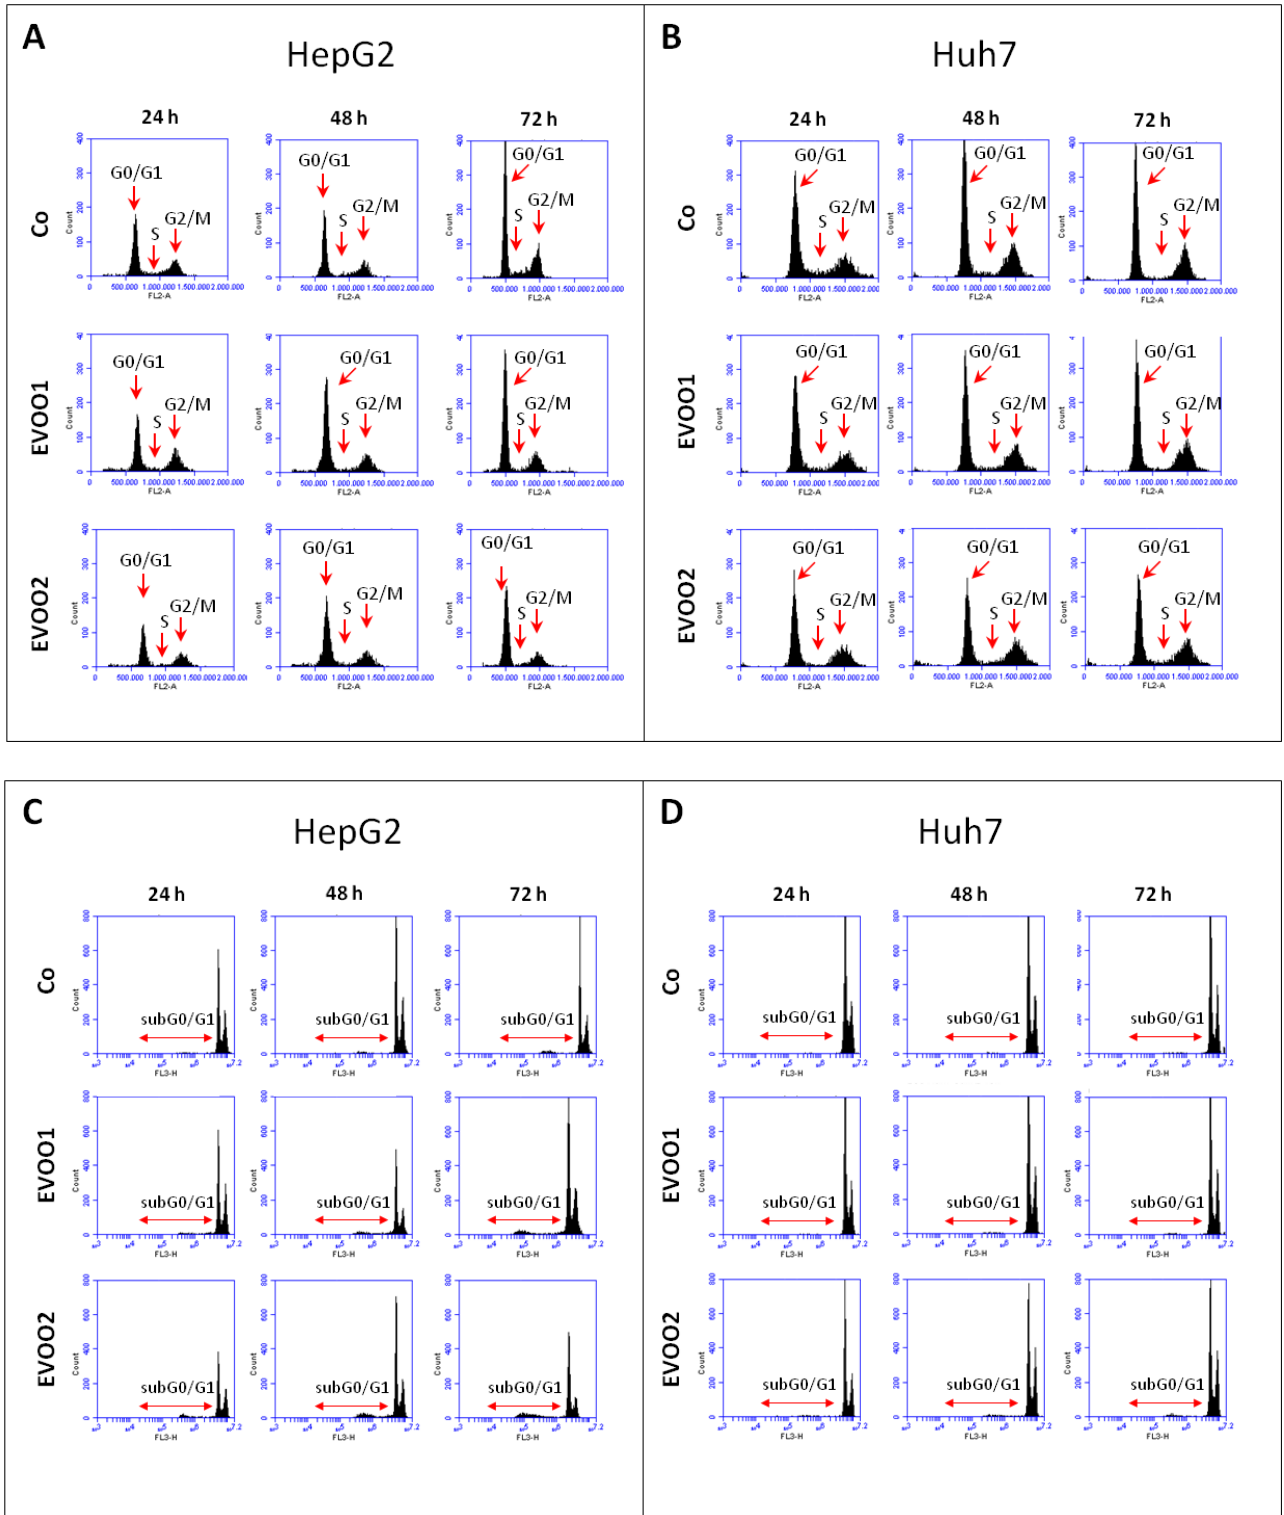

**Figure S2:** (A, B) cell cycle and (C, D) subG0/G1 cytograms of HepG2 and Huh7 cell lines incubated for 24-72 h with two different doses of EVOO.
