# Supplementary material for: Anti-Proliferative Effects of an Extra-Virgin Olive Oil Extract Enriched in Ligstroside Aglycone and Oleocanthal on Human Liver Cancer Cell Lines
Source: MDPI journal article supplement (doi:10.3390/cancers11111640), 2019-10-24
Supplement: s1 [file s1]

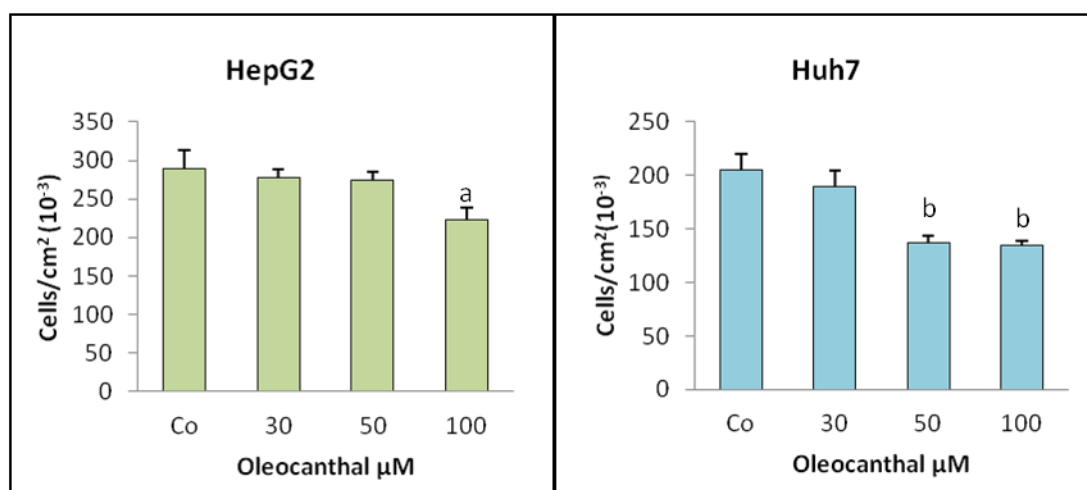

**Figure S6:** Growth curve of HepG2 and Huh7 cell lines incubated for 48 h with three different doses of oleocanthal. The results are representative of three experiments. Data are presented as mean  $\pm$  SD. (b  $p < 0,01$  vs Co).
