# Supplementary material for: Anti-Proliferative Effects of an Extra-Virgin Olive Oil Extract Enriched in Ligstroside Aglycone and Oleocanthal on Human Liver Cancer Cell Lines
Source: MDPI journal article supplement (doi:10.3390/cancers11111640), 2019-10-24
Supplement: s1 [file s1]

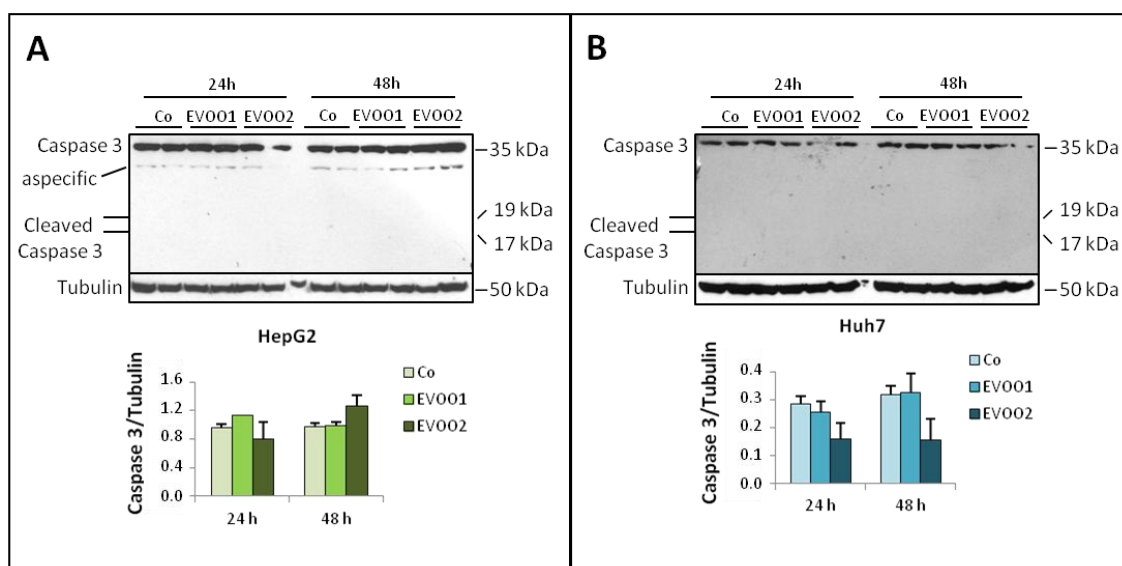

**Figure S3:** Expression of caspase-3 in HepG2 (A) and Huh7 (B) cell lines incubated for 24 and 48 h with two different doses of the phenolic extract. The protein molecular weights are reported.
