# Supplementary material for: Anti-Proliferative Effects of an Extra-Virgin Olive Oil Extract Enriched in Ligstroside Aglycone and Oleocanthal on Human Liver Cancer Cell Lines
Source: MDPI journal article supplement (doi:10.3390/cancers11111640), 2019-10-24
Supplement: s1 [file s1]

**Table S1:** Flow cytometric analysis of HepG2, Huh7 and Hep3B cell lines incubated for 24 and 48 h with different doses of the phenolic extract in the presence or absence of TNF $\alpha$ . The results are representative of three experiments. Data are presented as mean  $\pm$  SD. (a  $p<0,05$ , b  $p<0,01$ , c  $p<0,001$  vs Co; d  $p<0,05$ , e  $p<0,01$ ).

|                     |                                 | 24 h                            |                               |                                 | 48 h                          |                               |
|---------------------|---------------------------------|---------------------------------|-------------------------------|---------------------------------|-------------------------------|-------------------------------|
| HepG2               | G0/G1                           | S                               | G2/M                          | G0/G1                           | S                             | G2/M                          |
| Co                  | 50.71 $\pm$ 1.44                | 21.53 $\pm$ 2.67                | 27.76 $\pm$ 1.24              | 50.86 $\pm$ 2.00                | 16.13 $\pm$ 1.01              | 30.90 $\pm$ 1.24              |
| TNF $\alpha$        | 49.89 $\pm$ 1.95                | 21.90 $\pm$ 1.98                | 28.21 $\pm$ 3.93              | 51.55 $\pm$ 0.52                | 16.25 $\pm$ 0.92              | 32.20 $\pm$ 0.43              |
| EVOO1               | 49.61 $\pm$ 2.45                | 22.33 $\pm$ 0.29                | 28.06 $\pm$ 2.61              | 51.64 $\pm$ 1.18                | 17.46 $\pm$ 2.06              | 30.90 $\pm$ 1.24              |
| TNF $\alpha$ /EVOO1 | 50.27 $\pm$ 0.67                | 18.94 $\pm$ 0.50 <sup>c</sup>   | 30.80 $\pm$ 0.77 <sup>a</sup> | 56.12 $\pm$ 2.46 <sup>a,d</sup> | 14.86 $\pm$ 0.81              | 29.02 $\pm$ 1.83              |
| EVOO2               | 47.43 $\pm$ 1.23 <sup>a</sup>   | 15.85 $\pm$ 0.98 <sup>a</sup>   | 36.73 $\pm$ 2.16 <sup>b</sup> | 56.33 $\pm$ 1.44 <sup>a</sup>   | 12.33 $\pm$ 1.36 <sup>a</sup> | 31.34 $\pm$ 2.80              |
| TNF $\alpha$ /EVOO2 | 50.29 $\pm$ 0.52 <sup>d</sup>   | 11.53 $\pm$ 0.46 <sup>c,e</sup> | 38.15 $\pm$ 0.07 <sup>c</sup> | 57.05 $\pm$ 0.90 <sup>a</sup>   | 12.86 $\pm$ 0.67 <sup>b</sup> | 30.09 $\pm$ 1.51              |
|                     |                                 |                                 |                               |                                 |                               |                               |
| Huh7                | G0/G1                           | S                               | G2/M                          | G0/G1                           | S                             | G2/M                          |
| Co                  | 43.63 $\pm$ 1.71                | 17.00 $\pm$ 0.39                | 39.36 $\pm$ 1.79              | 48.06 $\pm$ 0.19                | 11.17 $\pm$ 1.04              | 40.77 $\pm$ 1.22              |
| TNF $\alpha$        | 46.33 $\pm$ 0.72                | 14.62 $\pm$ 1.09 <sup>a</sup>   | 39.08 $\pm$ 1.53              | 49.31 $\pm$ 0.94                | 10.71 $\pm$ 0.26              | 39.98 $\pm$ 0.98              |
| EVOO1               | 45.63 $\pm$ 1.07                | 13.29 $\pm$ 0.85 <sup>b</sup>   | 41.50 $\pm$ 1.52              | 43.93 $\pm$ 1.25 <sup>b</sup>   | 12.75 $\pm$ 1.93              | 43.33 $\pm$ 2.09              |
| TNF $\alpha$ /EVOO1 | 49.03 $\pm$ 0.36 <sup>b,e</sup> | 11.70 $\pm$ 0.91 <sup>c</sup>   | 39.26 $\pm$ 0.69              | 44.42 $\pm$ 0.69 <sup>c</sup>   | 12.91 $\pm$ 1.38              | 42.67 $\pm$ 0.71              |
| EVOO2               | 40.70 $\pm$ 1.10                | 18.65 $\pm$ 1.45                | 40.66 $\pm$ 2.28              | 36.92 $\pm$ 1.44 <sup>c</sup>   | 19.21 $\pm$ 0.29 <sup>c</sup> | 43.97 $\pm$ 1.68              |
| TNF $\alpha$ /EVOO2 | 37.49 $\pm$ 4.25                | 18.75 $\pm$ 1.65 <sup>c</sup>   | 43.76 $\pm$ 3.01              | 38.02 $\pm$ 0.49 <sup>c</sup>   | 21.42 $\pm$ 1.68 <sup>c</sup> | 40.56 $\pm$ 1.19 <sup>d</sup> |
|                     |                                 |                                 |                               |                                 |                               |                               |
|                     |                                 | 24 h                            |                               |                                 | 48 h                          |                               |
| Hep3B               | G0/G1                           | S                               | G2/M                          | G0/G1                           | S                             | G2/M                          |
| Co                  | 45.35 $\pm$ 0,54                | 38.21 $\pm$ 1,45                | 17.77 $\pm$ 2,4               | 44.42 $\pm$ 6,61                | 37.45 $\pm$ 1,58              | 18.14 $\pm$ 5,89              |
| TNF $\alpha$        | 44.97 $\pm$ 0,13                | 37.79 $\pm$ 0,14                | 17.25 $\pm$ 0,26              | 46.63 $\pm$ 0,56                | 34.99 $\pm$ 0,13              | 18.60 $\pm$ 0,43              |
| EVOO2               | 47.18 $\pm$ 0,93 <sup>a</sup>   | 28.74 $\pm$ 0,89 <sup>c</sup>   | 24.98 $\pm$ 0,75 <sup>a</sup> | 36.01 $\pm$ 0,84 <sup>c</sup>   | 40.92 $\pm$ 2,47              | 23.07 $\pm$ 1,64 <sup>a</sup> |
| TNF $\alpha$ /EVOO2 | 43.73 $\pm$ 2,51                | 29.89 $\pm$ 0,56                | 26.40 $\pm$ 1,96              | 30.74 $\pm$ 0,30 <sup>d</sup>   | 45.85 $\pm$ 1,85              | 23.41 $\pm$ 1,56              |
