# Supplementary material for: Anti-Proliferative Effects of an Extra-Virgin Olive Oil Extract Enriched in Ligstroside Aglycone and Oleocanthal on Human Liver Cancer Cell Lines
Source: MDPI journal article supplement (doi:10.3390/cancers11111640), 2019-10-24
Supplement: s1 [file s1]

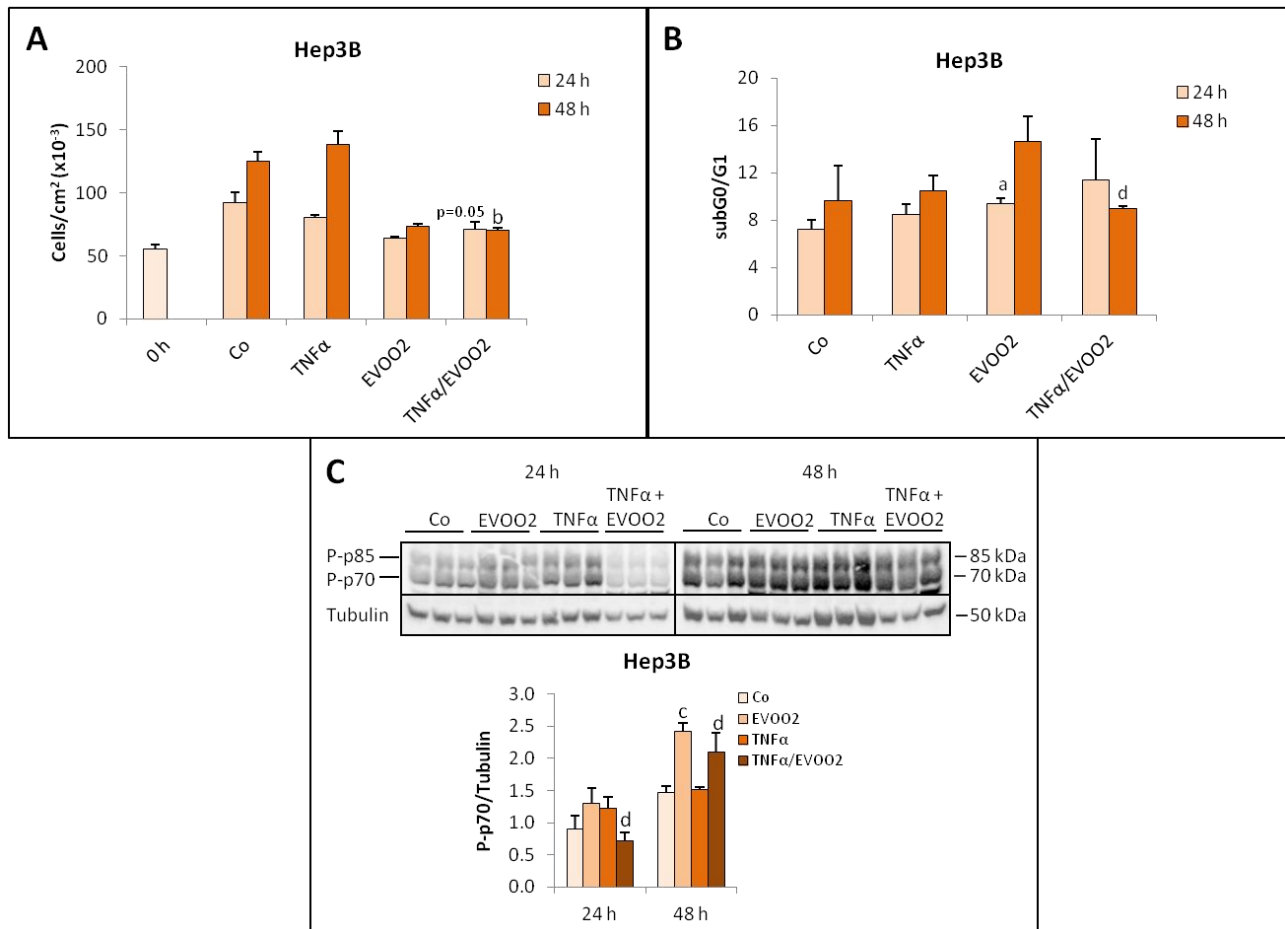

**Figure S5:** (A) Growth curve, (B) percentage of subG0/G1 and (C) expression of P-p70 in Hep3B cell lines incubated for 24 and 48 h with phenolic extract in the presence or absence of TNF $\alpha$ . The results are representative of three experiments. The protein molecular weights are reported. Data are presented as mean  $\pm$  SD. (a  $p<0,05$ , b  $p<0,01$ , c  $p<0,001$  vs Co; d  $p<0,05$  vs EVOO).
